# Supplementary material for: Graphene-supported polyoxometalate entrapped in a MIL-88A network with highly efficient conversion of polysulfides in Li–S batteries
Source: Royal Society of Chemistry journal article supplement (doi:10.1039/d2dt01743a), 2022-01-01
Supplement: d2dt01743a1.pdf [file d2dt01743a1.pdf]

## Supplementary Materials

### **Graphene-supported polyoxometalate entrapped in MIL-88A network with highly efficient conversion of polysulfides in Li-S batteries**

Xin-Yang Dong,<sup>a</sup> Ming-Liang Wang,<sup>a</sup> Yi Feng,<sup>a</sup> Jia-Yuan Zhang,<sup>a</sup> Yun-Dong Cao,<sup>a</sup>  
Guang-Gang Gao,<sup>\*a</sup> Yu-Xi Zhang,<sup>a</sup> Lin-Lin Fan<sup>\*a</sup>

Collaborative Innovation Center of Metal Nanoclusters & Photo/Electro-Catalysis and Sensing, School of Materials Science and Engineering, University of Jinan, 250022, Jinan, China.

\*Corresponding authors

E-mail: mse\_gaogg@ujn.edu.cn (Guanggang Gao); mse\_fanll@ujn.edu.cn (Linlin Fan).

## **Experiment section**

### **Chemical reagents and materials**

1,3-dioxolane (DOL), 1,2-dimethoxyethane (DME), lithium sulfide ( $\text{Li}_2\text{S}$ ), lithium bis(trifluoromethanesulfonyl) imide (LiTFSI), carbon black (CB, Super-P), polyvinylidene difluoride (PVDF) and lithium nitrate ( $\text{LiNO}_3$ ) were bought from Sigma-Aldrich. Graphite, fumaric acid, isopropanol, N,N-dimethylformamide (DMF),  $\text{Fe}(\text{NO}_3)_3 \cdot 6\text{H}_2\text{O}$ ,  $\text{Co}(\text{NO}_3)_2 \cdot 6\text{H}_2\text{O}$ , N-methyl-2-pyrrolidinone (NMP), isopropyl alcohol, ethylene glycol, concentrated nitric acid, potassium bromide (KBr) and absolute ethanol were purchased from Sinopharm Chemical Reagent Co. Ltd. Phosphotungstic acid ( $\text{H}_3\text{PW}_{12}\text{O}_{40} \cdot x\text{H}_2\text{O}$ ), sodium tungstate dihydrate ( $\text{Na}_2\text{WO}_4 \cdot 2\text{H}_2\text{O}$ ), dibasic sodium phosphate ( $\text{Na}_2\text{HPO}_4$ ), sodium metavanadate ( $\text{NaVO}_3$ ) and sublimed sulfur were obtained from Aladdin.

### **Synthesis of MIL-88A(FeCo)**

2 mmol  $\text{Fe}(\text{NO}_3)_3 \cdot 6\text{H}_2\text{O}$ , 2 mmol  $\text{Co}(\text{NO}_3)_2 \cdot 6\text{H}_2\text{O}$ , and 5 mmol fumaric acid were dissolved in 100 mL DMF and stirred at 75 °C for 4 h. After cooling down to room temperature, the samples were then centrifuged at 10000 rpm for 5 min and washed with distilled water and ethanol, and finally dried at 60 °C for 8 h in a vacuum drying oven.

### **Electrochemical measurements**

The working electrode was synthesized by mixing sulfur composites (70 wt%), Super-P (20 wt%), and PVDF (10 wt%) in NMP solvent. The electrode slurry was coated onto aluminum foil and dried at 60 °C overnight. Then, the electrodes were punched into 10 mm disks in diameter, and the electrode loading of sulfur was about 1.5 mg  $\text{cm}^{-2}$ . CR2032 coin cells were assembled to test the electrochemical performance. The electrolyte contained 1.0 M LiTFSI dissolved in the binary solvent of DOL and DME (1:1 in volume) with 1.0 wt%  $\text{LiNO}_3$ . The amount of the electrolyte was strictly controlled for performance evaluation in the coin cells, and the cell

contained an electrolyte to sulfur (E/S) ratio of 13 mL g<sup>-1</sup>. The cells were tested with constant current charge-discharge cycles on Neware battery test system between 1.7 and 2.8 V (vs. Li<sup>+</sup>/Li). Electrochemical impedance spectroscopy (EIS) and cyclic voltammetry (CV) tests were performed on a CHI 660E electrochemistry workstation (ChenHua, China). Galvanostatic intermittent titration technique (GITT) tests were performed on Neware battery test system. In addition, the electrolyte was replaced with 10  $\mu$ L Li<sub>2</sub>S<sub>6</sub> (0.5 M) during the preparation of the symmetric cells.

### **Physical characterization**

The morphologies of samples were analyzed by scanning electron microscope (SEM, FEG-250, 30 kV) and transmission electron microscope (TEM, JEM-2100F, 200 kV) equipped with an energy dispersive spectroscope. The structures of the samples were identified by X-ray diffraction (XRD, DX-2700). The chemical compositions and surface element states of the samples were carried out by X-ray photoelectron spectroscopy (XPS, VG ESCALAB MK II). Fourier transform infrared spectroscopy (FTIR) were obtained using a NEXUS-870 spectrophotometer with KBr pellets. Thermogravimetric analysis (TGA, Pyris Diamond6000 TG/DTA, PerkinElmer Co, America) was conducted to verify sulfur and rGO contents. Ultraviolet-visible (UV-vis) absorption spectra were conducted via UV spectrophotometer (UV-8000S Shanghai Yuanxi). The P, W, V, Fe, and Co contents were determined by inductively coupled plasma optical emission spectrometer (ICP-OES, Thermo iCAP 6300). Microanalysis of the composites was carried out using a Heraeus CHN-O-FLASH EA 1112 elemental analyzer. The specific surface area of samples was determined by the Brunauer-Emmett-Teller (BET) nitrogen adsorption/desorption method (Quadrachrome SI-MP, Quantachrome).

### **Lithium polysulfide adsorption measurements**

Firstly, Li<sub>2</sub>S<sub>6</sub> solution was prepared by dissolving Li<sub>2</sub>S and S (at a molar ratio of 1:5) in the solution of DOL/DME (1:1 by volume), and then stirred at 65 °C for 24 h. Subsequently, 3 mg M88A/rGO, PW<sub>12</sub>-M88A/rGO, PW<sub>11</sub>V-M88A/rGO, and PW<sub>10</sub>V<sub>2</sub>-M88A/rGO were immersed into 3 mL Li<sub>2</sub>S<sub>6</sub> solution under stirring for 6 h, respectively.

The adsorption capacity of the samples was investigated by XPS and UV-vis spectra.

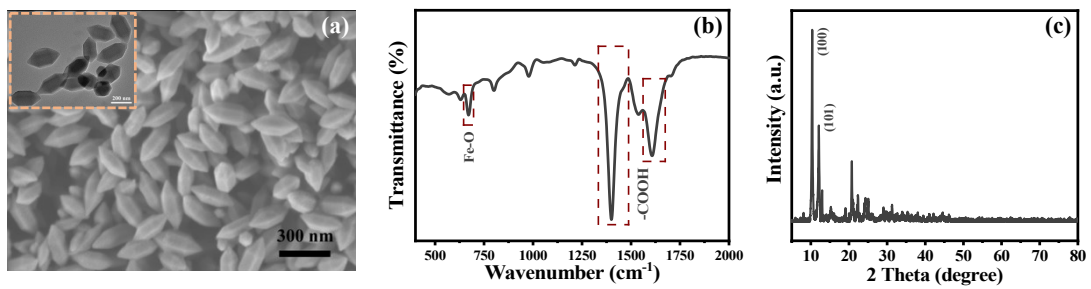

**Fig. S1** (a) SEM image of M88A (the insert is TEM image). (b) FTIR spectra and (c) XRD pattern of M88A.

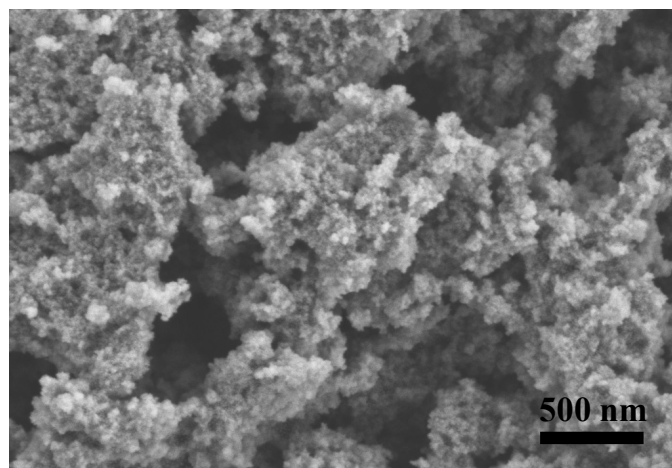

**Fig. S2** SEM image of  $\text{PW}_9\text{V}_3\text{-M88A}$ .

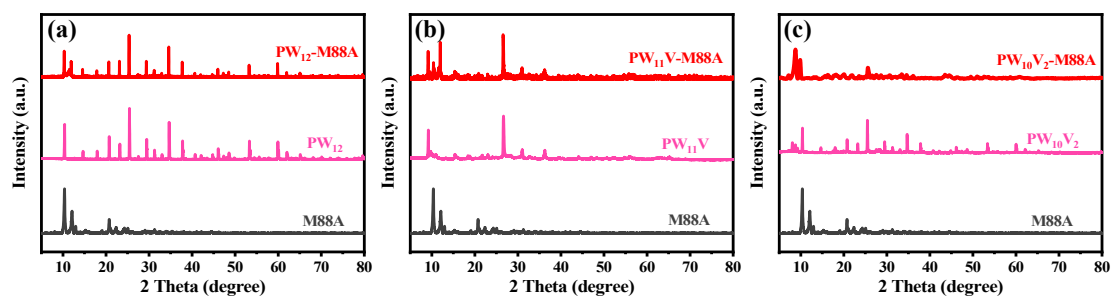

**Fig. S3** XRD patterns of M88A, POMs, and POMs-M88A.

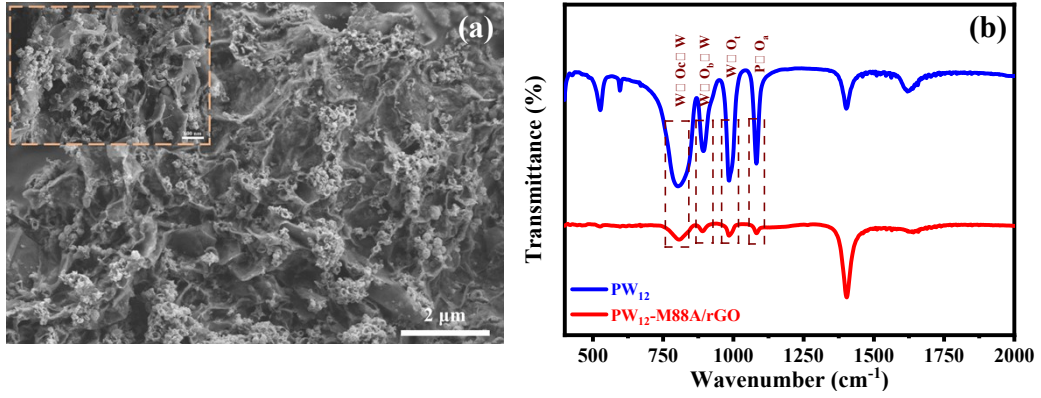

**Fig. S4** (a) SEM images of PW<sub>12</sub>-M88A/rGO. (b) FTIR spectra of PW<sub>12</sub> and PW<sub>12</sub>-M88A/rGO (O<sub>a</sub> denotes an O atom bound to three W atoms and one P atom, O<sub>t</sub> denotes the terminal O atoms, O<sub>b</sub> denotes the corner-bridged O atoms, and O<sub>c</sub> denotes the side-bridged O atoms).



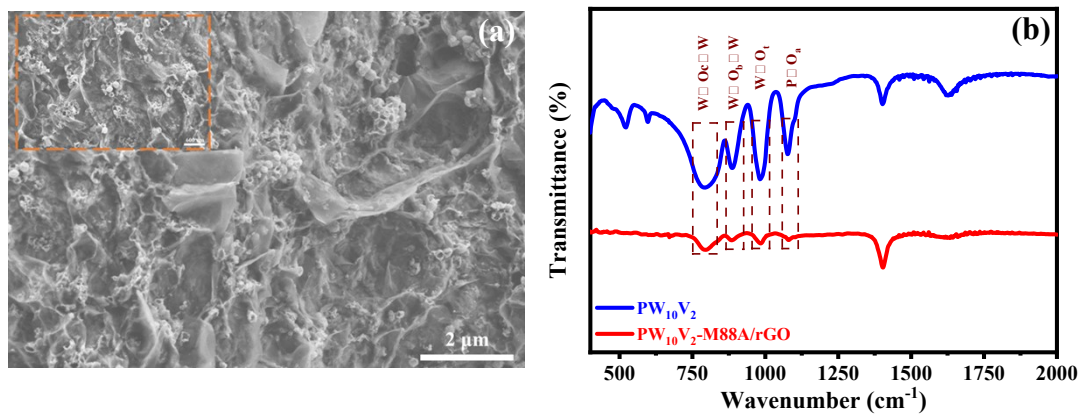

**Fig. S5** (a) SEM images of PW<sub>10</sub>V<sub>2</sub>-M88A/rGO. (b) FTIR spectra of PW<sub>10</sub>V<sub>2</sub> and PW<sub>10</sub>V<sub>2</sub>-M88A/rGO (O<sub>a</sub> denotes an O atom bound to three W atoms and one P atom, O<sub>t</sub> denotes the terminal O atoms, O<sub>b</sub> denotes the corner-bridged O atoms, and O<sub>c</sub> denotes the side-bridged O atoms).

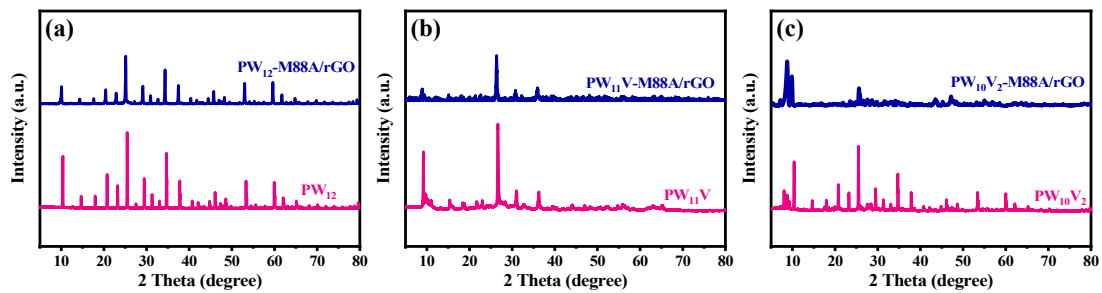

**Fig. S6** XRD patterns of POMs and POMs-M88A/rGO.

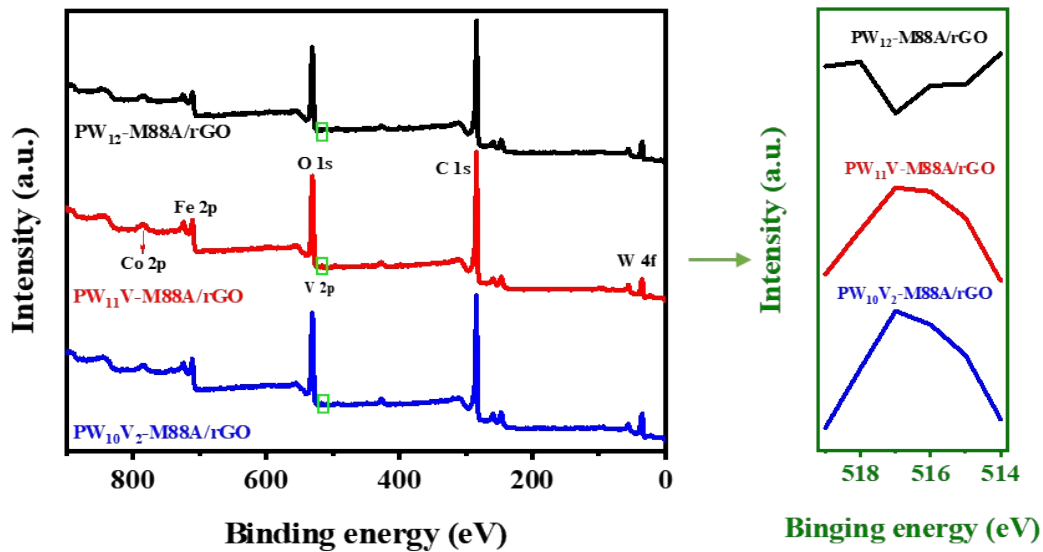

**Fig. S7** The survey spectra XPS analysis of  $PW_{12}M88A/rGO$ ,  $PW_{11}V-M88A/rGO$ , and  $PW_{10}V_2-M88A/rGO$ .

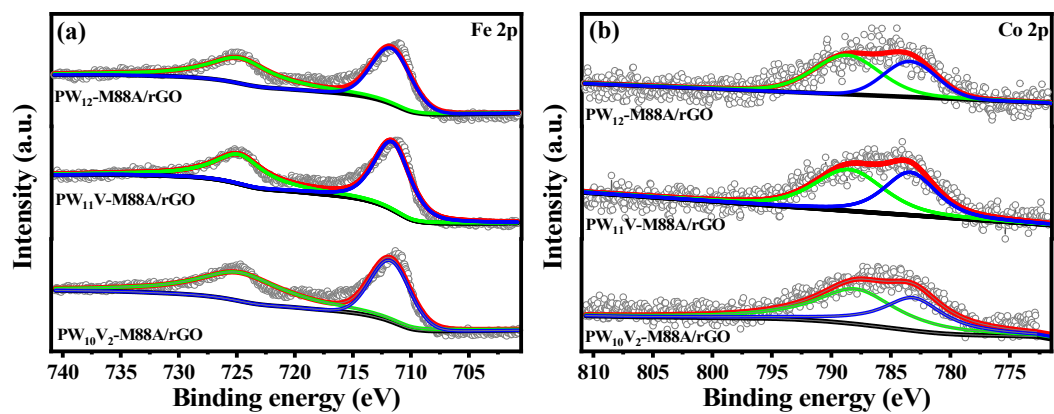

**Fig. S8** XPS analysis of PW<sub>12</sub>-M88A/rGO, PW<sub>11</sub>V-M88A/rGO, and PW<sub>10</sub>V<sub>2</sub>-M88A/rGO: (a) Fe 2p spectra and (b) Co 2p spectra.

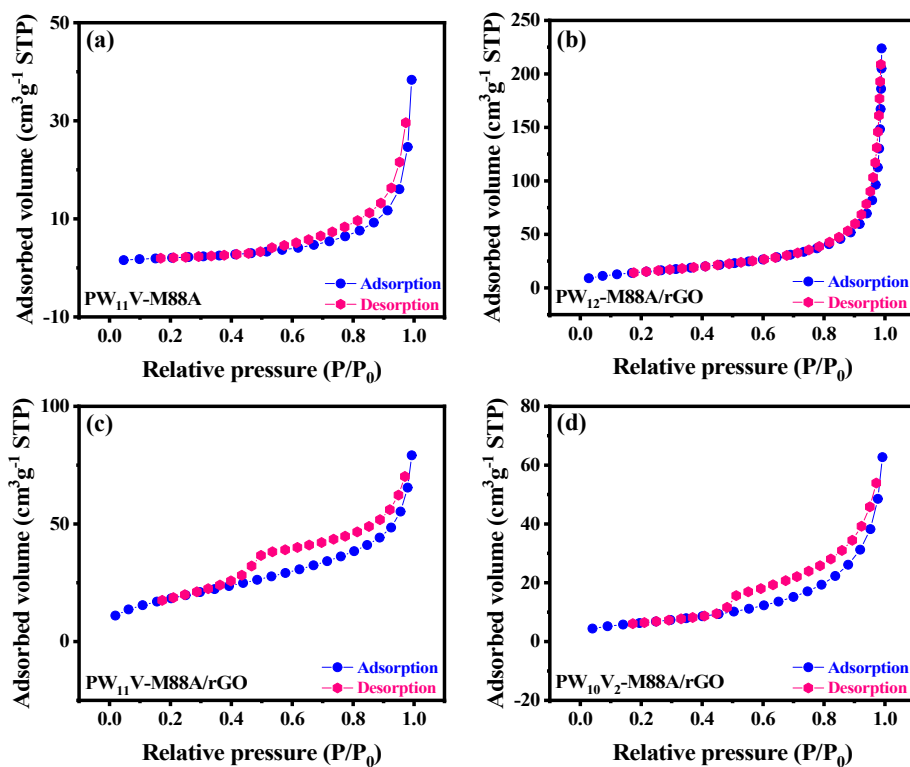

**Fig. S9**  $N_2$  adsorption-desorption isotherms of (a)  $PW_{11}V$ -M88A, (b)  $PW_{12}$ -M88A/rGO, (c)  $PW_{11}V$ -M88A/rGO, and (d)  $PW_{10}V_2$ -M88A/rGO.

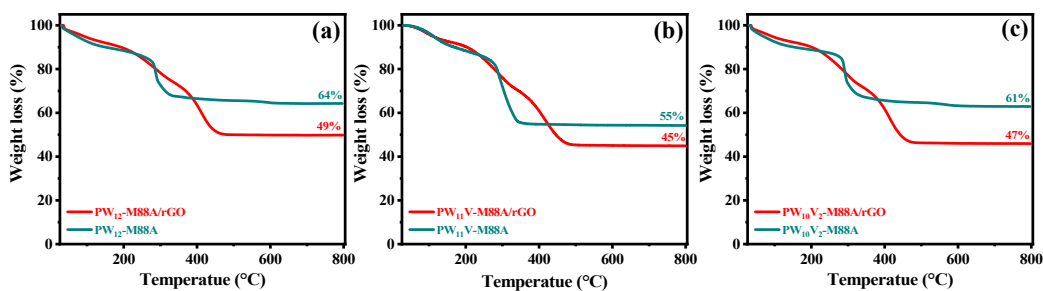

**Fig. S10** TGA curves of (a)  $PW_{12}$ -M88A and  $PW_{12}$ -M88A/rGO, (b)  $PW_{11}V$ -M88A and  $PW_{11}V$ -M88A/rGO, and (c)  $PW_{10}V_2$ -M88A and  $PW_{10}V_2$ -M88A/rGO.

Taking  $PW_{11}V$ -M88A and  $PW_{11}V$ -M88A/rGO as examples. During the TGA measurement in air flow, the  $PW_{11}V$ -M88A and  $PW_{11}V$ -M88A/rGO respectively remain 55% and 45% when the temperature gradually rises from room temperature to 800 °C. If one thinks that the content of rGO in  $PW_{11}V$ -M88A/rGO is  $x\%$ , then the content of  $PW_{11}V$ -M88A is  $(1 - x\%)$ . The following equation can be obtained:  $(1 - x\%) \times 55\% = 45\%$ , and the content of rGO in  $PW_{11}V$ -M88A/rGO is approximately calculated to be 18.2%.

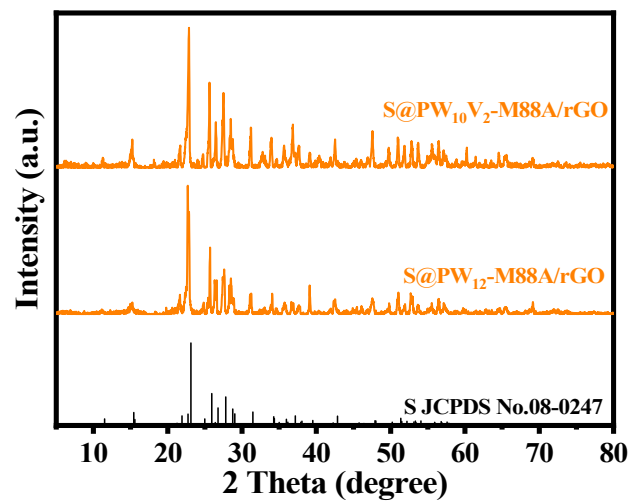

**Fig. S11** XRD patterns of S@PW<sub>12</sub>-M88A/rGO and S@PW<sub>10</sub>V<sub>2</sub>-M88A/rGO.

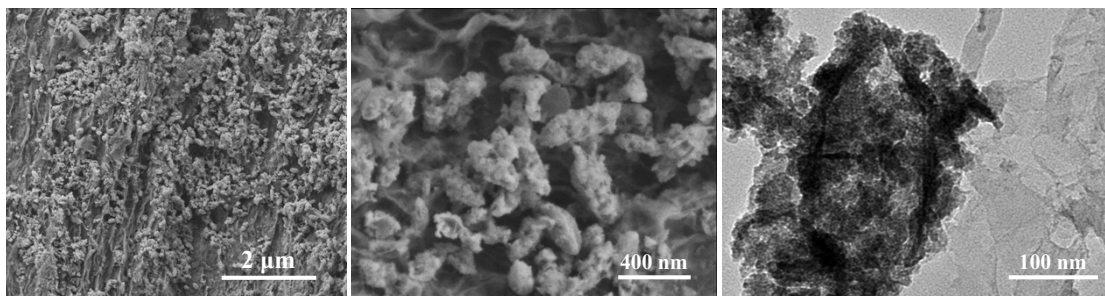

**Fig. S12** SEM and TEM images of S@PW<sub>11</sub>V-M88A/rGO.



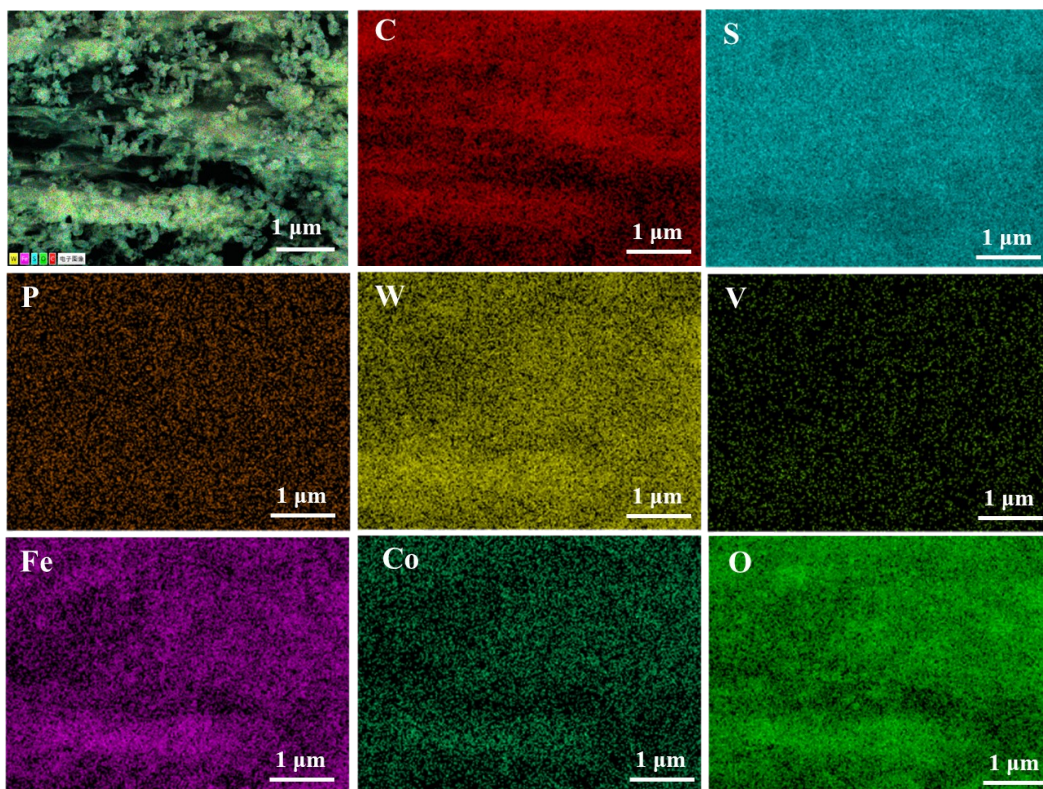

**Fig. S13** The elemental mapping of C, S, P, W, V, Fe, Co, and O of S@PW<sub>11</sub>V-M88A/rGO.

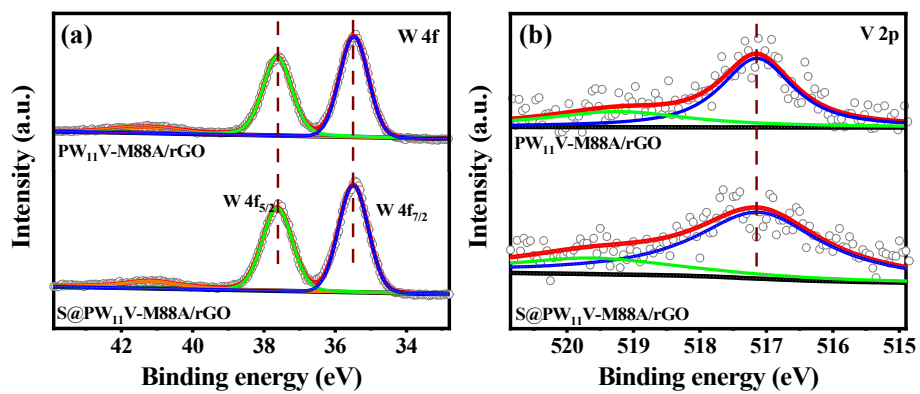

**Fig. S14** XPS analysis of  $PW_{11}V-M88A/rGO$  and  $S@PW_{11}V-M88A/rGO$ : (a) W 4f spectra and (b) V 2p spectra.

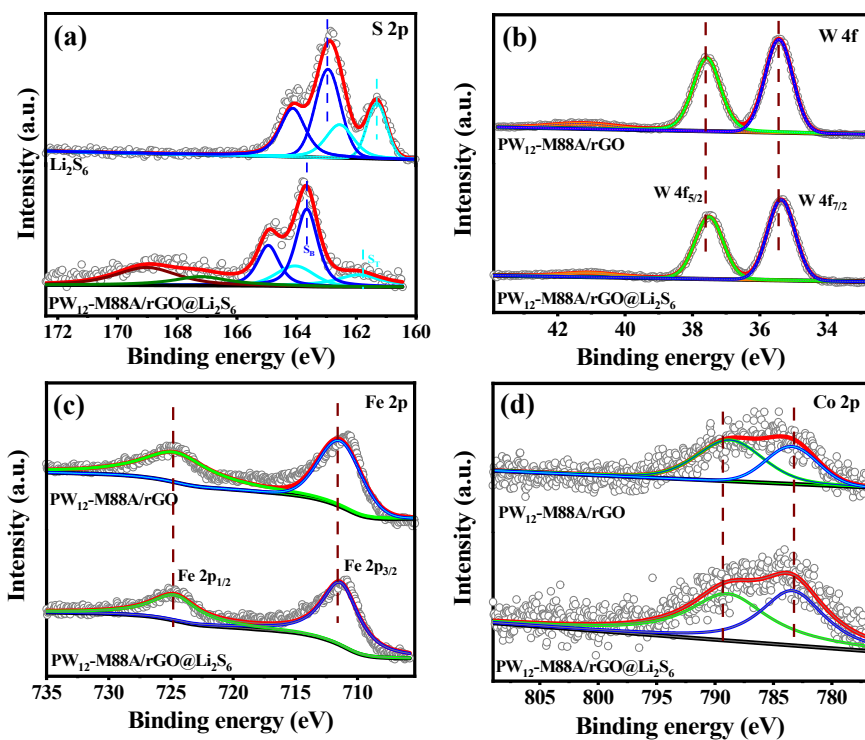

**Fig. S15** (a) XPS analysis of S 2p spectra for bare  $\text{Li}_2\text{S}_6$  and  $\text{PW}_{12}\text{-M88A/rGO@Li}_2\text{S}_6$ . XPS analysis of  $\text{PW}_{12}\text{-M88A/rGO}$  and  $\text{PW}_{12}\text{-M88A/rGO@Li}_2\text{S}_6$ : (b) W 4f spectra, (c) Fe 2p spectra, and (d) Co 2p spectra.

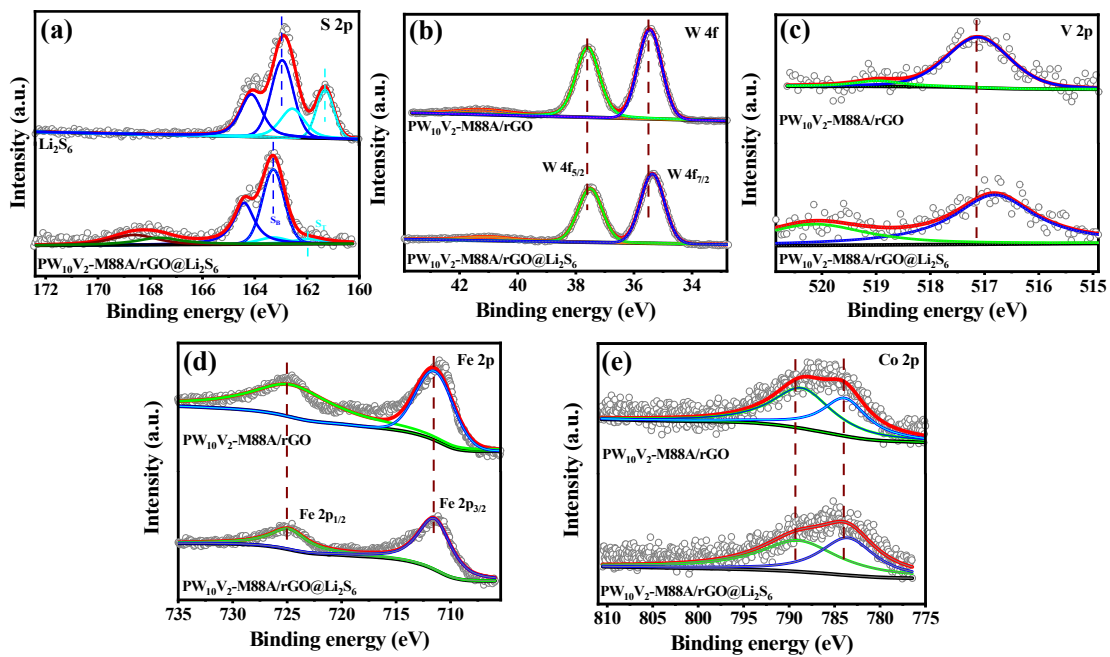

**Fig. S16** (a) XPS analysis of S 2p spectra for bare  $\text{Li}_2\text{S}_6$  and  $\text{PW}_{10}\text{V}_2\text{-M88A/rGO@Li}_2\text{S}_6$ . XPS analysis of  $\text{PW}_{10}\text{V}_2\text{-M88A/rGO}$  and  $\text{PW}_{10}\text{V}_2\text{-M88A/rGO@Li}_2\text{S}_6$ : (b) W 4f spectra, (c) V 2p spectra, (d) Fe 2p spectra, and (e) Co 2p spectra.

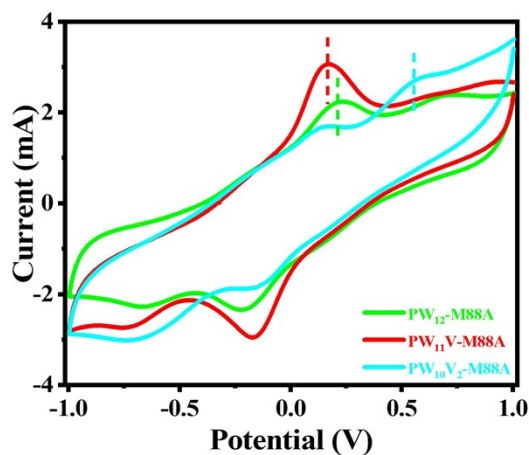

**Fig. S17** CV curves of symmetrical cells at  $10 \text{ mV s}^{-1}$  with  $\text{PW}_{12}\text{-M88A}$ ,  $\text{PW}_{11}\text{V-M88A}$ , and  $\text{PW}_{10}\text{V}_2\text{-M88A}$  working electrodes, respectively, and the electrolyte is  $0.5 \text{ M Li}_2\text{S}_6$  solution.

$\text{PW}_{10}\text{V}_2\text{-M88A}$  with more vanadium atoms presents the relatively strong oxidizability, which makes the catalytic oxidation of short-chain LiPSs into long-chain LiPSs more accessible during the charging process, corresponding to a higher oxidation potential. However, the collapse of hollow structure in  $\text{PW}_{10}\text{V}_2\text{-M88A}$  is not conducive to the enhancement of electrochemical performance.  $\text{PW}_{11}\text{V-M88A}$  with single vanadium atom implantation shows the suitable oxidizability (the oxidation potentials of  $\text{PW}_{11}\text{V-M88A}$  and  $\text{PW}_{12}\text{-M88A}$  are similar, both lower than that of  $\text{PW}_{10}\text{V}_2\text{-M88A}$ ), which can not only ensure the integrity of hollow structure, but also further enhance the effective adsorption and catalysis of polysulfides by the substituted vanadium atom in  $\text{PW}_{11}\text{V}$ .

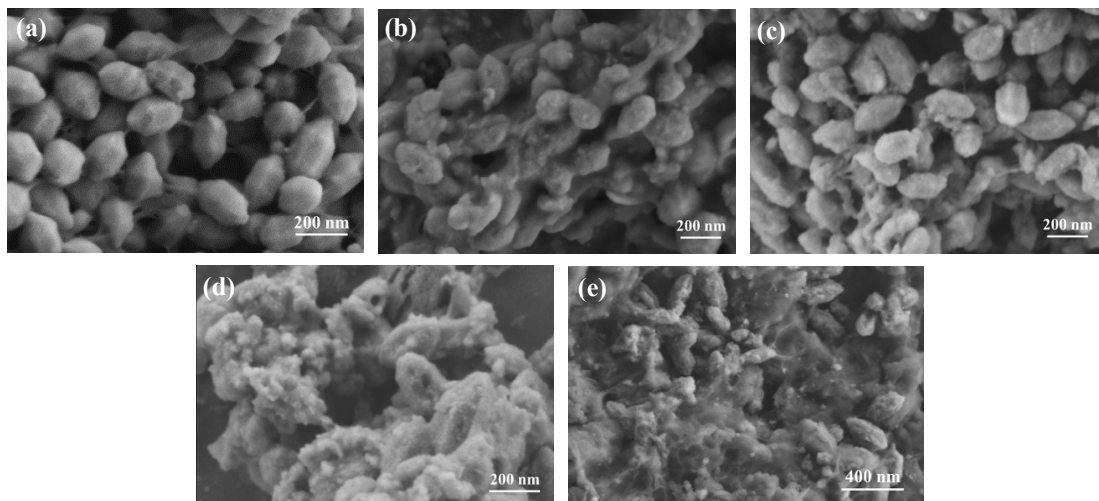

**Fig. S18** SEM images of (a) M88A, (b)  $\text{PW}_{12}\text{-M88A}$ , (c)  $\text{PW}_{11}\text{V-M88A}$ , (d)  $\text{PW}_{10}\text{V}_2\text{-M88A}$ , and (e)  $\text{PW}_{11}\text{V-M88A/rGO}$  after catalytic reaction.

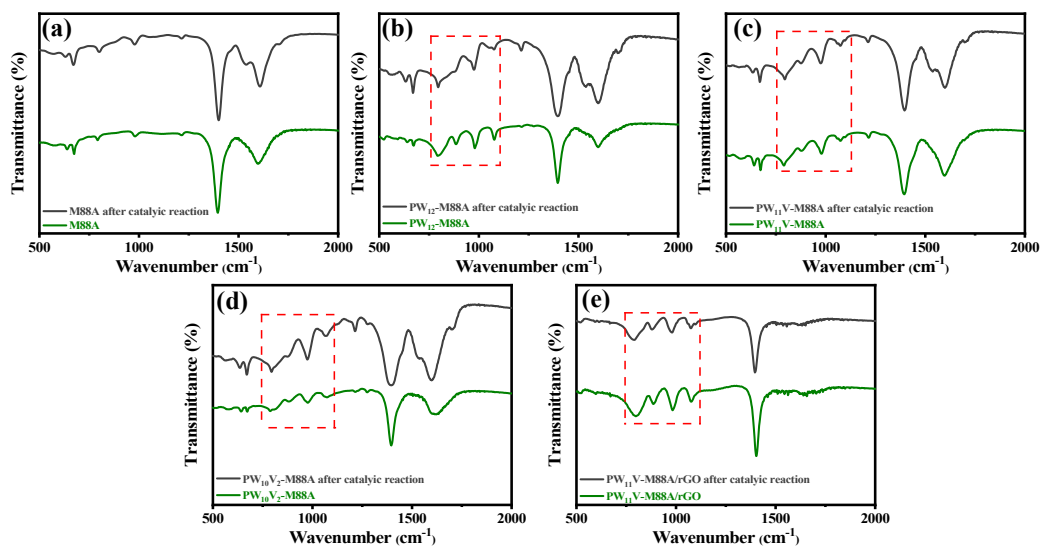

**Fig. S19** FTIR spectra of (a) pristine M88A and M88A after catalytic reaction, (b) pristine  $PW_{12}$ -M88A and  $PW_{12}$ -M88A after catalytic reaction, (c) pristine  $PW_{11}V$ -M88A and  $PW_{11}V$ -M88A after catalytic reaction, (d) pristine  $PW_{10}V_2$ -M88A and  $PW_{10}V_2$ -M88A after catalytic reaction, and (e) pristine  $PW_{11}V$ -M88A/rGO and  $PW_{11}V$ -M88A/rGO after catalytic reaction.

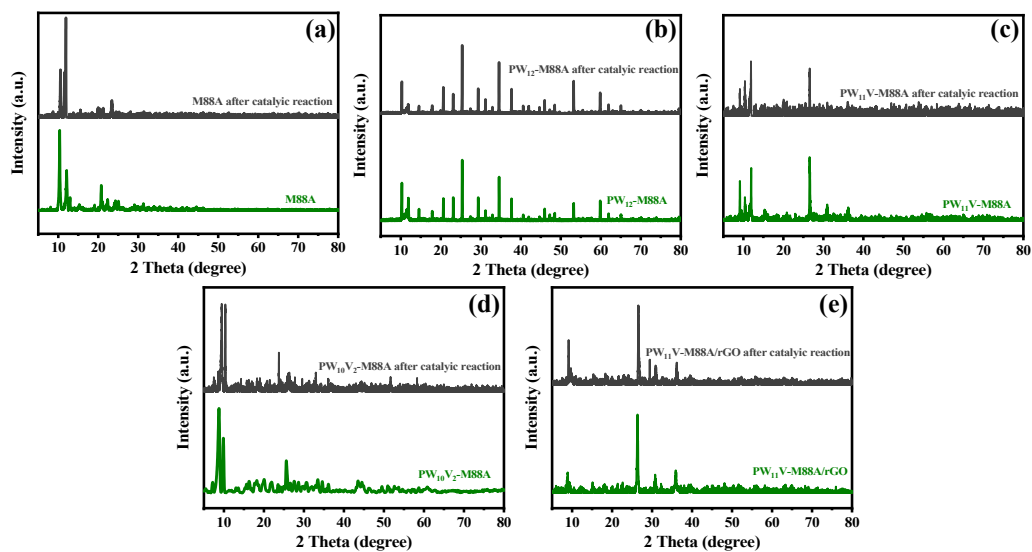

**Fig. S20** XRD patterns of (a) pristine M88A and M88A after catalytic reaction, (b) pristine PW<sub>12</sub>-M88A and PW<sub>12</sub>-M88A after catalytic reaction, (c) pristine PW<sub>11</sub>V-M88A and PW<sub>11</sub>V-M88A after catalytic reaction, (d) pristine PW<sub>10</sub>V<sub>2</sub>-M88A and PW<sub>10</sub>V<sub>2</sub>-M88A after catalytic reaction, and (e) pristine PW<sub>11</sub>V-M88A/rGO and PW<sub>11</sub>V-M88A/rGO after catalytic reaction.



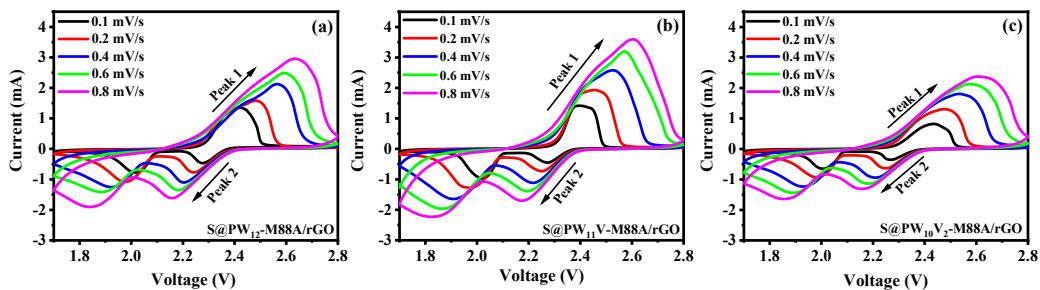

**Fig. S21** The CV curves of (a) S@PW<sub>12</sub>-M88A/rGO, (b) S@PW<sub>11</sub>V-M88A/rGO, and (c) S@PW<sub>10</sub>V<sub>2</sub>-M88A/rGO at scan rate of 0.1, 0.2, 0.4, 0.6, and 0.8 mV s<sup>-1</sup>. The coin cells are assembled with as-prepared samples as working electrodes, metallic lithium foil as the counter and reference electrodes, and 1 M LiTFSI in DOL/DME (1:1 by volume) with 1 wt% LiNO<sub>3</sub> as electrolyte.

**Table S1.** CHN results for PW<sub>12</sub>-M88A/rGO, PW<sub>11</sub>V-M88A/rGO, and PW<sub>10</sub>V<sub>2</sub>-M88A/rGO analyzed by CHN elemental analyzer.

| Samples                                   | C      | H     | N |
|-------------------------------------------|--------|-------|---|
| PW <sub>12</sub> -M88A/rGO                | 39.43% | 0.69% | / |
| PW <sub>11</sub> V-M88A/rGO               | 35.38% | 0.76% | / |
| PW <sub>10</sub> V <sub>2</sub> -M88A/rGO | 39.35% | 0.74% | / |

**Table S2.** P, W, V, Fe, and Co concentrations in PW<sub>12</sub>-M88A/rGO, PW<sub>11</sub>V-M88A/rGO, and PW<sub>10</sub>V<sub>2</sub>-M88A/rGO determined by ICP-OES analysis.

| Samples                                   | P       | W        | V       | Fe      | Co      |
|-------------------------------------------|---------|----------|---------|---------|---------|
| PW <sub>12</sub> -M88A/rGO                | 0.3302% | 23.5203% | /       | 5.8854% | 0.3096% |
| PW <sub>11</sub> V-M88A/rGO               | 0.3652% | 23.8464% | 0.6009% | 6.3480% | 0.3341% |
| PW <sub>10</sub> V <sub>2</sub> -M88A/rGO | 0.3529% | 20.9442% | 1.1610% | 6.0782% | 0.3199% |

**Table S3.** Cycling performance of S@PW<sub>11</sub>V-M88A/rGO compared with other previously reported sulfur cathodes with the representative catalysts in the literatures.

| Sulfur host                                    | Sulfur loading | Catalyst                             | Capacity decay rate per cycle (after n <sup>th</sup> cycle) | Reference |
|------------------------------------------------|----------------|--------------------------------------|-------------------------------------------------------------|-----------|
| C@TiN hollow spheres                           | 71.00%         | TiN                                  | 0.120% (150 <sup>th</sup> ) at 1 C                          | [1]       |
| Yolk-shelled Fe <sub>3</sub> O <sub>4</sub> @C | 80.00%         | Fe <sub>3</sub> O <sub>4</sub>       | 0.070% (200 <sup>th</sup> ) at 0.1 C                        | [2]       |
| NC/MoS <sub>3</sub> -S NBs                     | 70.00%         | MoS <sub>3</sub>                     | 0.076% (500 <sup>th</sup> ) at 0.5 C                        | [3]       |
| Fe <sub>3-x</sub> C@C-500                      | 74.00%         | Fe <sub>3-x</sub> C                  | 0.040% (1000 <sup>th</sup> ) at 1 C                         | [4]       |
| Graphene/TiN nanowires                         | 80.00%         | TiN                                  | 0.175% (200 <sup>th</sup> ) at 1 C                          | [5]       |
| N-CN-750@Co <sub>3</sub> Se <sub>4</sub>       | 61.50%         | Co <sub>3</sub> Se <sub>4</sub>      | 0.067% (800 <sup>th</sup> ) at 0.2 C                        | [6]       |
| (N-doped porous carbon cage) NHSC              | 69.58%         | NHSC                                 | 0.037% (500 <sup>th</sup> ) at 1 C                          | [7]       |
| C/Co <sub>3</sub> O <sub>4</sub>               | 66.00%         | Co <sub>3</sub> O <sub>4</sub>       | 0.066% (500 <sup>th</sup> ) at 0.5 C                        | [8]       |
| C@TiN                                          | 70.00%         | TiN                                  | 0.049% (300 <sup>th</sup> ) at 2 C                          | [9]       |
| TiB <sub>2</sub>                               | 71.00%         | TiB <sub>2</sub>                     | 0.058% (500 <sup>th</sup> ) at 1 C                          | [10]      |
| MXene/1T-2H MoS <sub>2</sub> -C                | 79.60%         | 1T-2H MoS <sub>2</sub>               | 0.070% (300 <sup>th</sup> ) at 2 C                          | [11]      |
| δ-MnO <sub>2</sub>                             | 72.50%         | δ-MnO <sub>2</sub>                   | 0.185% (200 <sup>th</sup> ) at 0.06 C                       | [12]      |
| NiO-NiCo <sub>2</sub> O <sub>4</sub> @C        | 73.00%         | NiO-NiCo <sub>2</sub> O <sub>4</sub> | 0.059% (500 <sup>th</sup> ) at 0.5 C                        | [13]      |
| CNTs/Co <sub>3</sub> S <sub>4</sub> -nanoboxes | 70.00%         | Co <sub>3</sub> S <sub>4</sub>       | 0.068% (500 <sup>th</sup> ) at 2 C                          | [14]      |
| PW <sub>11</sub> V-M88A/rGO                    | 70.00%         | PW <sub>11</sub> V                   | 0.046% (500 <sup>th</sup> ) at 3 C                          | This work |

## References

- [1] Y. Wang, R. Zhang, Y. Pang, X. Chen, J. Lang, J. Xu, C. Xiao, H. Li, K. Xi and S. Ding, *Energy Storage Mater.*, 2019, **16**, 228-235.
- [2] J. He, L. Luo, Y. Chen and A. Manthiram, *Adv. Mater.*, 2017, **29**, 1702707.
- [3] J. Yu, J. Xiao, A. Li, Z. Yang, L. Zeng, Q. Zhang, Y. Zhu and L. Guo, *Angew. Chem., Int. Ed.*, 2020, **59**, 13071-13078.
- [4] Y. Zhang, G. Li, J. Wang, G. Cui, X. Wei, L. Shui, K. Kempa, G. Zhou, X. Wang and Z. Chen, *Adv. Funct. Mater.*, 2020, **30**, 2001165.

- [5] R. Wang, J. Yang, X. Chen, Y. Zhao, W. Zhao, G. Qian, S. Li, Y. Xiao, H. Chen, Y. Ye, G. Zhou and F. Pan, *Adv. Energy Mater.*, 2020, **10**, 1903550.
- [6] D. Cai, B. Liu, D. Zhu, D. Chen, M. Lu, J. Cao, Y. Wang, W. Huang, Y. Shao, H. Tu and W. Han, *Adv. Energy Mater.*, 2020, **10**, 1904273.
- [7] S. Zeng, G.M. Arumugam, X. Liu, Y. Yang, X. Li, H. Zhong, F. Guo and Y. Mai, *Small*, 2020, **16**, 2001027.
- [8] F. Ma, J. Liang, T. Wang, X. Chen, Y. Fan, B. Hultman, H. Xie, J. Han, G. Wu and Q. Li, *Nanoscale*, 2018, **10**, 5634-5642.
- [9] Y. Wang, R. Zhang, Y. Pang, X. Chen, J. Lang, J. Xu, C. Xiao, H. Li, K. Xi and S. Ding, *Energy Storage Mater.*, 2019, **16**, 228-235.
- [10] C. Li, X. Liu, L. Zhu, R. Huang, M. Zhao, L. Xu and Y. Qian, *Chem. Mater.*, 2018, **30**, 6969-6977.
- [11] Y. Zhang, Z. Mu, C. Yang, Z. Xu, S. Zhang, X. Zhang, Y. Li, J. Lai, Z. Sun, Y. Yang, Y. Chao, C. Li, X. Ge, W. Yang and S. Guo, *Adv. Funct. Mater.*, 2018, **28**, 1707578.
- [12] K. Cao, H. Liu, Y. Li, Y. Wang and L. Jiao, *Energy Storage Mater.*, 2017, **9**, 78-84.
- [13] L. Hu, C. Dai, H. Liu, Y. Li, B. Shen, Y. Chen, S.-J. Bao and M. Xu, *Adv. Energy Mater.*, 2018, **8**, 1800709.
- [14] T. Chen, Z. Zhang, B. Cheng, R. Chen, Y. Hu, L. Ma, G. Zhu, J. Liu and Z. Jin, *J. Am. Chem. Soc.*, 2017, **139**, 12710-12715.
